# Supplementary material for: Particle-size effect of nanoscale platinum catalysts in oxygen reduction reaction: an electrochemical and 195Pt EC-NMR study
Source: Royal Society of Chemistry journal article supplement (doi:10.1039/b610573d), 2006-01-01
Supplement: b610573d.pdf [file b610573d.pdf]

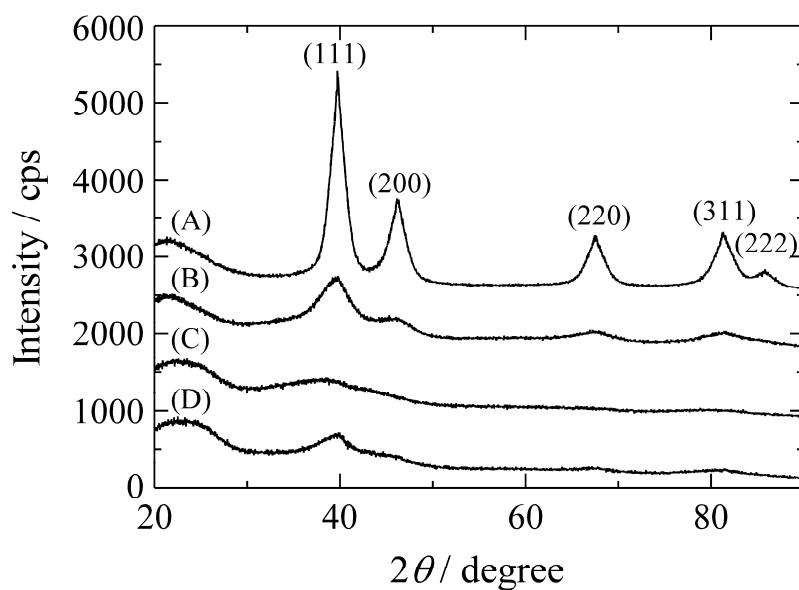

Figure XRD patterns for Pt(4.8 nm)/CB (line A), Pt(2.6 nm)/CB (line B), (1.6 nm)/CB (line C), Pt(2.6 nm)/CB with the same Pt loading as 1.6 nm size catalyst (line D).
